# Supplementary material for: Estimation of the probability of daily fluctuations of incidence of COVID-19 according to official data
Source: PeerJ. 2021 Jun 4;9:e11049. doi: 10.7717/peerj.11049 (PMC8183426; doi:10.7717/peerj.11049)
Supplement: Supplemental Information 1 — Raw data on number of COVID-19 cases and deaths by the regions in March-August 2020. [file peerj-09-11049-s001.xlsx]

## Sheet: Poland
the date, m	New cases	Number of deaths
2020-03-04
2020-03-05	0
2020-03-06	4
2020-03-07	0
2020-03-08	6
2020-03-09	5
2020-03-10	6
2020-03-11	9
2020-03-12	18
2020-03-13	19
2020-03-14	35
2020-03-15	16
2020-03-16	58
2020-03-17	61
2020-03-18	13
2020-03-19	104
2020-03-20	70
2020-03-21	111
2020-03-22	98
2020-03-23	115
2020-03-24	152
2020-03-25	150
2020-03-26	170
2020-03-27	168
2020-03-28	249
2020-03-29	224
2020-03-30	193
2020-03-31	256
2020-04-01	243
2020-04-02	392	14
2020-04-03	437	14
2020-04-04	244	8
2020-04-05	475	15
2020-04-06	311	13
2020-04-07	435	22
2020-04-08	357	30
2020-04-09	370	15
2020-04-10	380	7
2020-04-11	401	27
2020-04-12	318	24
2020-04-13	260	13
2020-04-14	268	18
2020-04-15	380	23
2020-04-16	336	28
2020-04-17	461	18
2020-04-18	363	15
2020-04-19	545	13
2020-04-20	306	20
2020-04-21	263	21
2020-04-22	313	25
2020-04-23	342	28
2020-04-24	381	40
2020-04-25	381	30
2020-04-26	344	11
2020-04-27	285	27
2020-04-28	316	34
2020-04-29	422	28
2020-04-30	237	20
2020-05-01	228	7
2020-05-02	270	13
2020-05-03	318	14
2020-05-04	313	20
2020-05-05	425	18
2020-05-06	309	17
2020-05-07	307	22
2020-05-08	319	21
2020-05-09	285	9
2020-05-10	345	15
2020-05-11	330	11
2020-05-12	595	28
2020-05-13	283	22
2020-05-14	411	22
2020-05-15	401	24
2020-05-16	241	8
2020-05-17	272	10
2020-05-18	356	11
2020-05-19	383	12
2020-05-20	471	14
2020-05-21	404	10
2020-05-22	476	10
2020-05-23	312	11
2020-05-24	395	3
2020-05-25	305	11
2020-05-26	443	17
2020-05-27	399	4
2020-05-28	352	10
2020-05-29	330	13
2020-05-30	416	10
2020-05-31	215	3
2020-06-01	379	10
2020-06-02	230	18
2020-06-03	292	23
2020-06-04	361	2
2020-06-05	362	20
2020-06-06	576	16
2020-06-07	575	4
2020-06-08	599	9
2020-06-09	400	17
2020-06-10	282	23
2020-06-11	359	9
2020-06-12	376	7
2020-06-13	440	15
2020-06-14	375	10
2020-06-15	396	9
2020-06-16	407	16
2020-06-17	506	14
2020-06-18	314	30
2020-06-19	301	18
2020-06-20	304	12
2020-06-21	311	10
2020-06-22	296	3
2020-06-23	300	16
2020-06-24	294	21
2020-06-25	298	16
2020-06-26	276	17
2020-06-27	319	6
2020-06-28	193	3
2020-06-29	247	6
2020-06-30	239	19
2020-07-01	382	14
2020-07-02	371	15
2020-07-03	259	15
2020-07-04	314	5
2020-07-05	231	5
2020-07-06	205	4
2020-07-07	257	7
2020-07-08	277	14
2020-07-09	262	9
2020-07-10	265	11
2020-07-11	305	6
2020-07-12	370	3
2020-07-13	299	5
2020-07-14	267	12
2020-07-15	264	6
2020-07-16	333	11
2020-07-17	353	7
2020-07-18	339	6
2020-07-19	358	6
2020-07-20	279	3
2020-07-21	399	9
2020-07-22	380	6
2020-07-23	418	9
2020-07-24	458	4
2020-07-25	584	9
2020-07-26	443	7
2020-07-27	337	5

## Sheet: Russia
the date, m	New cases	Number of deaths	the date, m	New cases	Number of deaths	the date, m	New cases	Number of deaths
2020-03-01	0	Russia	2020-03-01	0	Moscow	2020-03-01		Russia without Moscow
2020-03-02	1		2020-03-02	0		2020-03-02
2020-03-03	0		2020-03-03	0		2020-03-03
2020-03-04	0		2020-03-04	0		2020-03-04
2020-03-05	1		2020-03-05	0		2020-03-05
2020-03-06	9		2020-03-06	5		2020-03-06
2020-03-07	0		2020-03-07	0		2020-03-07
2020-03-08	4		2020-03-08	0		2020-03-08
2020-03-09	0		2020-03-09	3		2020-03-09
2020-03-10	3		2020-03-10	3		2020-03-10
2020-03-11	0		2020-03-11	6		2020-03-11
2020-03-12	8		2020-03-12	4		2020-03-12
2020-03-13	17		2020-03-13	5		2020-03-13
2020-03-14	14		2020-03-14	9		2020-03-14
2020-03-15	4		2020-03-15	0		2020-03-15
2020-03-16	27		2020-03-16	18		2020-03-16
2020-03-17	24		2020-03-17	2		2020-03-17
2020-03-18	33		2020-03-18	31		2020-03-18
2020-03-19	52		2020-03-19	12		2020-03-19
2020-03-20	54		2020-03-20	33		2020-03-20
2020-03-21	53		2020-03-21	6		2020-03-21
2020-03-22	61		2020-03-22	54		2020-03-22
2020-03-23	71		2020-03-23	71		2020-03-23
2020-03-24	57		2020-03-24	28		2020-03-24
2020-03-25	163		2020-03-25	120		2020-03-25
2020-03-26	182		2020-03-26	136		2020-03-26
2020-03-27	196		2020-03-27	157		2020-03-27
2020-03-28	228		2020-03-28	114		2020-03-28
2020-03-29	270		2020-03-29	197		2020-03-29
2020-03-30	302		2020-03-30	212		2020-03-30
2020-03-31	501		2020-03-31	387		2020-03-31
2020-04-01	440		2020-04-01	267		2020-04-01
2020-04-02	771		2020-04-02	595		2020-04-02
2020-04-03	601		2020-04-03	448		2020-04-03
2020-04-04	582		2020-04-04	434		2020-04-04
2020-04-05	658		2020-04-05	536		2020-04-05
2020-04-06	954		2020-04-06	591		2020-04-06
2020-04-07	1154		2020-04-07	697		2020-04-07
2020-04-08	1175		2020-04-08	660		2020-04-08
2020-04-09	1459		2020-04-09	857		2020-04-09
2020-04-10	1786		2020-04-10	1124		2020-04-10
2020-04-11	1667		2020-04-11	1030		2020-04-11
2020-04-12	2186		2020-04-12	1306		2020-04-12
2020-04-13	2558		2020-04-13	1355		2020-04-13
2020-04-14	2774		2020-04-14	1489		2020-04-14
2020-04-15	3388		2020-04-15	1774		2020-04-15
2020-04-16	3448		2020-04-16	1370		2020-04-16
2020-04-17	4070		2020-04-17	1959		2020-04-17
2020-04-18	4785		2020-04-18	2649		2020-04-18
2020-04-19	6060		2020-04-19	3570		2020-04-19
2020-04-20	4268		2020-04-20	2026		2020-04-20
2020-04-21	5642		2020-04-21	3083		2020-04-21
2020-04-22	5236		2020-04-22	2548		2020-04-22
2020-04-23	4774		2020-04-23	1959		2020-04-23
2020-04-24	5849		2020-04-24	2957		2020-04-24
2020-04-25	5966		2020-04-25	2616		2020-04-25
2020-04-26	6361		2020-04-26	2971		2020-04-26
2020-04-27	6198		2020-04-27	2871		2020-04-27
2020-04-28	6411		2020-04-28	3075		2020-04-28
2020-04-29	5841		2020-04-29	2220		2020-04-29
2020-04-30	7099		2020-04-30	3093		2020-04-30
2020-05-01	7933		2020-05-01	3561		2020-05-01
2020-05-02	9623		2020-05-02	5358		2020-05-02
2020-05-03	10633		2020-05-03	5948		2020-05-03
2020-05-04	10581		2020-05-04	5795		2020-05-04
2020-05-05	10102		2020-05-05	5714		2020-05-05
2020-05-06	10559		2020-05-06	5858		2020-05-06
2020-05-07	11231		2020-05-07	6703		2020-05-07
2020-05-08	10699		2020-05-08	5846		2020-05-08
2020-05-09	10817		2020-05-09	5667		2020-05-09
2020-05-10	11012		2020-05-10	5551		2020-05-10
2020-05-11	11656		2020-05-11	6169		2020-05-11
2020-05-12	10899		2020-05-12	5392		2020-05-12
2020-05-13	10028		2020-05-13	4703		2020-05-13
2020-05-14	9974		2020-05-14	4712		2020-05-14
2020-05-15	10598		2020-05-15	4748		2020-05-15
2020-05-16	9200		2020-05-16	3505		2020-05-16
2020-05-17	9709		2020-05-17	3855		2020-05-17
2020-05-18	8926		2020-05-18	3238		2020-05-18
2020-05-19	9263		2020-05-19	3545		2020-05-19
2020-05-20	9262		2020-05-20	2699		2020-05-20
2020-05-21	8849		2020-05-21	2913		2020-05-21
2020-05-22	8894		2020-05-22	2988		2020-05-22
2020-05-23	9434		2020-05-23	3190		2020-05-23
2020-05-24	8599		2020-05-24	2516		2020-05-24
2020-05-25	8946		2020-05-25	2560		2020-05-25
2020-05-26	8915		2020-05-26	2830		2020-05-26
2020-05-27	8338		2020-05-27	2140		2020-05-27
2020-05-28	8371		2020-05-28	2054		2020-05-28
2020-05-29	8264		2020-05-29	2332		2020-05-29
2020-05-30	8212		2020-05-30	2367		2020-05-30
2020-05-31	9268		2020-05-31	2595		2020-05-31
2020-06-01	9035		2020-06-01	2297		2020-06-01
2020-06-02	8863		2020-06-02	2286		2020-06-02
2020-06-03	8536		2020-06-03	1842		2020-06-03
2020-06-04	8666		2020-06-04	1998		2020-06-04
2020-06-05	8726		2020-06-05	1855		2020-06-05
2020-06-06	8855		2020-06-06	1992		2020-06-06
2020-06-07	8984		2020-06-07	1956		2020-06-07
2020-06-08	8965		2020-06-08	1633		2020-06-08
2020-06-09	8595		2020-06-09	1572		2020-06-09
2020-06-10	8404		2020-06-10	1195		2020-06-10
2020-06-11	8779		2020-06-11	1436		2020-06-11
2020-06-12	8987		2020-06-12	1714		2020-06-12
2020-06-13	8706		2020-06-13	1493		2020-06-13
2020-06-14	8835		2020-06-14	1477		2020-06-14
2020-06-15	8246		2020-06-15	1359		2020-06-15
2020-06-16	8248		2020-06-16	1416		2020-06-16
2020-06-17	7843		2020-06-17	1065		2020-06-17
2020-06-18	7790		2020-06-18	1040		2020-06-18
2020-06-19	7972		2020-06-19	1136		2020-06-19	6836
2020-06-20	7889		2020-06-20	1057		2020-06-20	6832
2020-06-21	7728		2020-06-21	1007		2020-06-21	6721
2020-06-22	7600		2020-06-22	1114		2020-06-22	6486
2020-06-23	7425		2020-06-23	1081		2020-06-23	6344
2020-06-24	7176		2020-06-24	811		2020-06-24	6365
2020-06-25	7113		2020-06-25	885		2020-06-25	6228
2020-06-26	6800		2020-06-26	813		2020-06-26	5987
2020-06-27	6852		2020-06-27	750		2020-06-27	6102
2020-06-28	6791		2020-06-28	717		2020-06-28	6074
2020-06-29	6719		2020-06-29	782		2020-06-29	5937
2020-06-30	6693		2020-06-30	745		2020-06-30	5948
2020-07-01	6556	216	2020-07-01	611	35	2020-07-01	5945	181
2020-07-02	6760	147	2020-07-02	662	39	2020-07-02	6098	108
2020-07-03	6718	176	2020-07-03	659	34	2020-07-03	6059	142
2020-07-04	6632	168	2020-07-04	680	25	2020-07-04	5952	143
2020-07-05	6736	134	2020-07-05	650	24	2020-07-05	6086	110
2020-07-06	6611	135	2020-07-06	685	22	2020-07-06	5926	113
2020-07-07	6368	198	2020-07-07	629	24	2020-07-07	5739	174
2020-07-08	6562	173	2020-07-08	621	32	2020-07-08	5941	141
2020-07-09	6509	176	2020-07-09	568	28	2020-07-09	5941	148
2020-07-10	6635	174	2020-07-10	637	29	2020-07-10	5998	145
2020-07-11	6611	188	2020-07-11	678	27	2020-07-11	5933	161
2020-07-12	6615	130	2020-07-12	679	28	2020-07-12	5936	102
2020-07-13	6537	104	2020-07-13	672	25	2020-07-13	5865	79
2020-07-14	6248	175	2020-07-14	613	37	2020-07-14	5635	138
2020-07-15	6422	156	2020-07-15	628	29	2020-07-15	5794	127
2020-07-16	6428	167	2020-07-16	531	24	2020-07-16	5897	143
2020-07-17	6406	186	2020-07-17	575	13	2020-07-17	5831	173
2020-07-18	6234	124	2020-07-18	578	14	2020-07-18	5656	110
2020-07-19	6109	95	2020-07-19	591	14	2020-07-19	5518	81
2020-07-20	5940	85	2020-07-20	578	15	2020-07-20	5362	70
2020-07-21	5842	153	2020-07-21	602	17	2020-07-21	5240	136
2020-07-22	5862	165	2020-07-22	638	19	2020-07-22	5224	146
2020-07-23	5848	147	2020-07-23	608	14	2020-07-23	5240	133
2020-07-24	5811	154	2020-07-24	645	11	2020-07-24	5166	143
2020-07-25	5871	146	2020-07-25	648	14	2020-07-25	5223	132
2020-07-26	5765	77	2020-07-26	683	9	2020-07-26	5082	68
2020-07-27	5635	85	2020-07-27	694	13	2020-07-27	4941	72
2020-07-28	5395	150	2020-07-28	674	10	2020-07-28	4721	140
2020-07-29	5475	169	2020-07-29	671	13	2020-07-29	4804	156
2020-07-30	5509	129	2020-07-30	678	12	2020-07-30	4831	117
2020-07-31	5482	161	2020-07-31	695	14	2020-07-31	4787	147
2020-08-01	5462	95	2020-08-01	690	13	2020-08-01	4772	82
2020-08-02	5427	70	2020-08-02	664	12	2020-08-02	4763	58
2020-08-03	5394	79	2020-08-03	693	13	2020-08-03	4701	66
2020-08-04	5159	144	2020-08-04	691	12	2020-08-04	4468	132
2020-08-05	5204	139	2020-08-05	687	11	2020-08-05	4517	128
2020-08-06	5267	116	2020-08-06	684	13	2020-08-06	4583	103
2020-08-07	5241	119	2020-08-07	686	12	2020-08-07	4555	107
2020-08-08	5212	129	2020-08-08	691	14	2020-08-08	4521	115
2020-08-09	5189	77	2020-08-09	689	12	2020-08-09	4500	65
2020-08-10	5118	70	2020-08-10	694	13	2020-08-10	4424	57
2020-08-11	4945	130	2020-08-11	694	14	2020-08-11	4251	116
2020-08-12	5102	129	2020-08-12	689	12	2020-08-12	4413	117

## Sheet: Moscow
the date, m	New cases	Number of deaths
2020-03-01	0
2020-03-02	0
2020-03-03	0
2020-03-04	0
2020-03-05	0
2020-03-06	5
2020-03-07	0
2020-03-08	0
2020-03-09	3
2020-03-10	3
2020-03-11	6
2020-03-12	4
2020-03-13	5
2020-03-14	9
2020-03-15	0
2020-03-16	18
2020-03-17	2
2020-03-18	31
2020-03-19	12
2020-03-20	33
2020-03-21	6
2020-03-22	54
2020-03-23	71
2020-03-24	28
2020-03-25	120
2020-03-26	136
2020-03-27	157
2020-03-28	114
2020-03-29	197
2020-03-30	212
2020-03-31	387
2020-04-01	267
2020-04-02	595
2020-04-03	448
2020-04-04	434
2020-04-05	536
2020-04-06	591
2020-04-07	697
2020-04-08	660
2020-04-09	857
2020-04-10	1124
2020-04-11	1030
2020-04-12	1306
2020-04-13	1355
2020-04-14	1489
2020-04-15	1774
2020-04-16	1370
2020-04-17	1959
2020-04-18	2649
2020-04-19	3570
2020-04-20	2026
2020-04-21	3083
2020-04-22	2548
2020-04-23	1959
2020-04-24	2957
2020-04-25	2616
2020-04-26	2971
2020-04-27	2871
2020-04-28	3075
2020-04-29	2220
2020-04-30	3093
2020-05-01	3561
2020-05-02	5358
2020-05-03	5948
2020-05-04	5795
2020-05-05	5714
2020-05-06	5858
2020-05-07	6703
2020-05-08	5846
2020-05-09	5667
2020-05-10	5551
2020-05-11	6169
2020-05-12	5392
2020-05-13	4703
2020-05-14	4712
2020-05-15	4748
2020-05-16	3505
2020-05-17	3855
2020-05-18	3238
2020-05-19	3545
2020-05-20	2699
2020-05-21	2913
2020-05-22	2988
2020-05-23	3190
2020-05-24	2516
2020-05-25	2560
2020-05-26	2830
2020-05-27	2140
2020-05-28	2054
2020-05-29	2332
2020-05-30	2367
2020-05-31	2595
2020-06-01	2297
2020-06-02	2286
2020-06-03	1842
2020-06-04	1998
2020-06-05	1855
2020-06-06	1992
2020-06-07	1956
2020-06-08	1633
2020-06-09	1572
2020-06-10	1195
2020-06-11	1436
2020-06-12	1714
2020-06-13	1493
2020-06-14	1477
2020-06-15	1359
2020-06-16	1416
2020-06-17	1065
2020-06-18	1040
2020-06-19	1136
2020-06-20	1057
2020-06-21	1007
2020-06-22	1114
2020-06-23	1081
2020-06-24	811
2020-06-25	885
2020-06-26	813
2020-06-27	750
2020-06-28	717
2020-06-29	782
2020-06-30	745
2020-07-01	611	35
2020-07-02	662	39
2020-07-03	659	34
2020-07-04	680	25
2020-07-05	650	24
2020-07-06	685	22
2020-07-07	629	24
2020-07-08	621	32
2020-07-09	568	28
2020-07-10	637	29
2020-07-11	678	27
2020-07-12	679	28
2020-07-13	672	25
2020-07-14	613	37
2020-07-15	628	29
2020-07-16	531	24
2020-07-17	575	13
2020-07-18	578	14
2020-07-19	591	14
2020-07-20	578	15
2020-07-21	602	17
2020-07-22	638	19
2020-07-23	608	14
2020-07-24	645	11
2020-07-25	648	14
2020-07-26	683	9
2020-07-27	694	13
2020-07-28	674	10
2020-07-29	671	13
2020-07-30	678	12
2020-07-31	695	14
2020-08-01	690	13
2020-08-02	664	12
2020-08-03	693	13
2020-08-04	691	12
2020-08-05	687	11
2020-08-06	684	13
2020-08-07	686	12
2020-08-08	691	14
2020-08-09	689	12
2020-08-10	694	13
2020-08-11	694	14
2020-08-12	689	12
